# Supplementary material
Source: publisher figshare collection journal article supplement (https://gsapubs.figshare.com/ndownloader/files/33946613)
Supplement: Supplementary file 1 [file 33946613]

## Sheet: Table S5 LASS
Table S5. Laser "Ablation Split Stream" age data
								age		age		age				SHRIMP
Analysis	207Pb/235U	1 SE	206Pb/238U	1 SE	rho	207Pb/206Pb	1 SE	207Pb/235U	1 SE	206Pb/238U	1 SE	207Pb/206Pb	1SE	Best age	2 SE	Best Age (Ma)	2s (Ma)	Th/U LASS	U LASS (ppm)	Th/U SHRIMP	U SHRIMP (ppm)	a-dosage (SHRIMP)
TUNG-16	0.0635444	0.00294258	0.00902357	0.00026718	0.722979	0.0514098	0.00165672	62.5548	2.80545	57.9088	1.70672	259.247	72.3949	57.9088	3.41345	70.1986	4.00019	0.353881	296.534	0.425249	345.4	n/a
TUNG-9	0.0708539	0.0030157	0.00952758	0.000261494	0.727533	0.0542911	0.00159681	69.5095	2.85546	61.128	1.66957	383.143	64.7741	61.128	3.33915	66.1838	4.17184	0.446884	447.674	0.400673	390.504	n/a
TUNG-25.23	0.0655753	0.00267391	0.00979382	0.000254889	0.723384	0.0488805	0.00138659	64.4919	2.54477	62.8278	1.62698	142.103	65.2594	62.8278	3.25396	68.4604	2.55616	0.405694	465.868	0.490943	276.648	n/a
TUNG-108	0.0735076	0.00303907	0.00982876	0.000263019	0.729513	0.0545985	0.00155504	72.0225	2.87046	63.0509	1.67881	395.817	62.6262	63.0509	3.35762	70.6708	4.06242	0.47654	485.374	0.334864	301.629	n/a
TUNG-335	0.0848258	0.00389412	0.00985836	0.000266922	0.688442	0.062816	0.00211079	82.6719	3.63832	63.2399	1.70367	702.009	69.9576	63.2399	3.40734	68.0597	1.79638	0.420186	369.033	0.343879	220.354	n/a
TUNG-123.2	0.0652099	0.0016086	0.00998354	0.000223051	0.932688	0.0476844	0.000425451	64.1437	1.5322	64.0389	1.42351	83.6397	21.0348	64.0389	2.84702	73.5638	2.70926	0.0323144	4377.71	0.092723	973.731	n/a
TUNG-27.1	0.0637819	0.00208542	0.0101404	0.000257925	0.828165	0.0459187	0.000844863	62.7815	1.98859	65.0399	1.64579	1.43787e-08	37.1683	65.0399	3.29158	66.7657	3.49824	0.219788	916.152	0.459212	385.597	n/a
TUNG-26	0.0748852	0.00283466	0.0111699	0.000291531	0.760535	0.0489433	0.00121011	73.3248	2.67422	71.6067	1.8583	145.118	56.9936	71.6067	3.71661	71.8907	2.31199	0.246314	620.897	0.287578	304.623	n/a
TUNG_12	0.0781385	0.00350382	0.0120156	0.000335	0.711096	0.0474751	0.00150881	76.3933	3.29452	76.996	2.13356	73.1939	73.8688	76.996	4.26711	86.3195	4.61315	0.0734036	252.159	0.073861	214.397	n/a
TUNG_13	0.0973799	0.00281634	0.0132159	0.000306249	0.847869	0.0537922	0.000828041	94.3549	2.60256	84.6371	1.94816	362.362	34.3508	84.6371	3.89632	1425.32	44.3828	0.0219323	1556.4	0.525241	82.1181	n/a
TUNG_105.1	0.124622	0.00366425	0.0186841	0.000448058	0.858658	0.0486932	0.000736416	119.254	3.30295	119.334	2.83477	133.084	35.175	119.334	5.66953	160.107	4.93115	0.0324574	877.829	0.0275602	721.567	n/a
TUNG_111	0.141669	0.00513463	0.0209534	0.000521468	0.759005	0.0493589	0.00117194	134.529	4.55643	133.679	3.29176	164.916	54.571	133.679	6.58353	150.378	7.81654	1.17623	279.084	1.28841	475.379	n/a
TUNG_2.2	0.143235	0.00360669	0.0210735	0.000482588	0.935266	0.0496205	0.000443413	135.922	3.1983	134.437	3.04603	177.256	20.7065	134.437	6.09207	158.05	6.04188	0.033016	2348.67	0.0454291	1523.08	n/a
TUNG-352.1	1.14167	0.0475908	0.0596826	0.00219742	0.907181	0.13965	0.00245323	773.302	22.3161	373.695	13.3538	2222.87	30.1219	373.695	26.7076	108.487	10.3135	0.1113	364.222	0.087621	215.609	n/a
TUNG_203.1	1.44605	0.0350712	0.143599	0.00325142	0.953073	0.0735155	0.000540894	908.236	14.4551	864.984	18.3021	1028.2	14.8071	1028.2	29.6141	896.18	138.53	0.462273	382.386	0.393496	206.201	713229147507267
TUNG_106	1.89812	0.0467554	0.177788	0.00400177	0.93916	0.0779414	0.000661241	1080.43	16.2505	1054.88	21.8658	1145.38	16.7667	1145.38	33.5333	1124.85	43.5038	0.203791	210.468	0.165025	199.547	8.46356e+14
TUNG_25.1	1.91962	0.0477414	0.171374	0.00394952	0.947099	0.0817746	0.000654037	1087.94	16.4692	1019.67	21.6988	1240.12	15.5963	1240.12	31.1927	1228.22	30.7001	0.861809	282.005	0.9689	323.886	1771194089092223
TUNG_355	3.29217	0.0754308	0.234629	0.00516252	0.97811	0.102435	0.000490165	1479.2	17.6894	1358.71	26.8991	1668.7	8.82396	1668.7	17.6479	1645.32	58.2752	0.0811759	724.724	0.0830615	621.631	4027985932108860
TUNG_104.1	3.30427	0.0756868	0.234597	0.00515959	0.978	0.102825	0.000493119	1482.06	17.6995	1358.54	26.8846	1675.74	8.83545	1675.74	17.6709	1716.76	10.5249	0.102617	1153.96	0.0230439	1694.14	1.14165e+16
TUNG_201.1	3.09406	0.0728785	0.219412	0.00493218	0.972685	0.102948	0.000564634	1431.22	17.9159	1278.77	26.0214	1677.93	10.0977	1677.93	20.1955	1728.55	80.2564	0.0716942	812.481	0.111452	731.625	5061557700669577
TUNG_123.1	2.73527	0.0701603	0.160687	0.00385554	0.955736	0.12427	0.000940089	1338.09	18.8953	960.593	21.3781	2018.42	13.3488	2018.42	26.6977	2294.5	136.973	0.335469	541.354	0.456075	107.6	1.13643e+15
TUNG_336.1	3.51743	0.0870049	0.20384	0.00479502	0.966836	0.125975	0.000797359	1531.14	19.3702	1195.92	25.6258	2042.54	11.1463	2042.54	22.2927	1775.31	41.2038	0.213725	449.257	0.107207	654.8	4676270507129914
TUNG_329.1	5.64625	0.16004	0.281253	0.00764662	0.971665	0.146558	0.000983247	1923.19	24.1605	1597.67	38.3584	2306.15	11.4747	2306.15	22.9494	2309.21	21.3716	0.395359	192.884	0.670485	630.033	6965175810499449
TUNG_4.1	6.37671	0.14585	0.309069	0.00684948	0.982655	0.150622	0.000640617	2029.07	19.88	1736.12	33.6418	2353	7.24921	2353	14.4984	2422.27	28.7596	0.402407	1360.05	0.555657	109.672	1.26684e+15
TUNG_201.2	7.91487	0.19424	0.372329	0.008606	0.959549	0.15519	0.00107439	2221.37	21.8859	2040.35	40.2998	2403.92	11.7197	2403.92	23.4394	2489.98	29.0688	0.599496	105.773	0.488485	43.2429	5.12576e+14
TUNG_203.2	1.18125	0.0298531	0.120193	0.00284696	0.957472	0.0717477	0.000524453	791.894	13.8025	731.676	16.3627	978.792	14.822	978.792	29.644	n.d.	n.d.	0.322191	625.313	n.d.	n.d.	n.d.
TUNG_4.67	0.654892	0.0209102	0.0502608	0.00153973	0.970669	0.0951234	0.000731	511.485	12.7493	316.123	9.44379	1530.52	14.4015	316.123	18.8876	n.d.	n.d.	0.14482	620.05	n.d.	n.d.	n.d.
TUNG-329.2	0.0718099	0.00296925	0.0100674	0.000278014	0.742964	0.0520732	0.00145022	70.4155	2.80904	64.5741	1.77409	288.627	62.4251	64.5741	3.54817	n.d.	n.d.	0.386336	613.334	n.d.	n.d.	n.d.
TUNG-336R	0.0640628	0.0024689	0.00886659	0.000243026	0.776175	0.0527468	0.0012885	63.0496	2.35322	56.9058	1.55269	317.922	54.6003	56.9058	3.10538	n.d.	n.d.	0.285091	502.49	n.d.	n.d.	n.d.
TUNG-352R	0.0690217	0.00213166	0.00990215	0.000231676	0.811846	0.0508866	0.000921558	67.7706	2.02269	63.5194	1.47867	235.695	41.2556	63.5194	2.95734	n.d.	n.d.	0.340709	1107.15	n.d.	n.d.	n.d.
TUNG-401	0.064878	0.00157934	0.00999542	0.000225218	0.946587	0.0473853	0.000372737	63.8272	1.50482	64.1147	1.43732	68.6909	18.6088	64.1147	2.87463	n.d.	n.d.	0.0384816	9169.49	n.d.	n.d.	n.d.
TUNG-5.1	0.0733337	0.00291658	0.0112857	0.000281755	0.716406	0.0474375	0.00132688	71.8581	2.75537	72.345	1.79579	71.3065	65.2097	72.345	3.59158	n.d.	n.d.	0.291118	499.755	n.d.	n.d.	n.d.
SECONDARY STANDARDS
plesovice_1	0.425334	0.00562852	0.0570723	0.000491315	0.650536	0.054051	0.000543227	359.858	4.00176	357.796	2.99552	373.174	22.4677	337
plesovice_2	0.424364	0.00591909	0.0578282	0.000560936	0.695436	0.0532228	0.00053345	359.167	4.21079	362.404	3.41745	338.305	22.5451	337
plesovice_3	0.414107	0.00497446	0.0564065	0.00046339	0.683885	0.0532453	0.000466653	351.828	3.56559	353.735	2.82708	339.266	19.7276	337
plesovice_4	0.421663	0.00460396	0.0580187	0.000429418	0.677869	0.0527104	0.000423114	357.24	3.28294	363.565	2.61588	316.35	18.1514	337
plesovice_5	0.42976	0.00447081	0.0580626	0.000427274	0.707376	0.0536819	0.000394737	363.006	3.17011	363.832	2.60271	357.73	16.5139	337
plesovice_6	0.424059	0.00443516	0.0575909	0.000409609	0.680037	0.0534036	0.000409509	358.949	3.15744	360.958	2.49624	345.985	17.2532	337
plesovice_7	0.415537	0.00413357	0.0568233	0.000369763	0.654155	0.0530373	0.00039905	352.854	2.96075	356.277	2.25509	330.394	16.9771	337
plesovice_8	0.420438	0.00465949	0.0582049	0.000445983	0.691389	0.0523892	0.000419475	356.364	3.32533	364.699	2.71628	302.433	18.1507	337
plesovice_9	0.419948	0.00407042	0.0571513	0.000363463	0.656131	0.0532927	0.000389812	356.014	2.90653	358.278	2.21599	341.278	16.4752	337
plesovice_10	0.422772	0.00547325	0.0584379	0.000519118	0.686172	0.05247	0.000494136	358.031	3.89857	366.118	3.16091	305.946	21.3141	337
plesovice_11	0.436349	0.00529942	0.0593051	0.000489061	0.67901	0.053363	0.000475781	367.675	3.73937	371.398	2.9755	344.264	20.0493	337
plesovice_12	0.418008	0.00506445	0.0580106	0.000501168	0.713063	0.0522607	0.000443919	354.626	3.62001	363.516	3.05287	296.835	19.2683	337
plesovice_13	0.437131	0.0052246	0.0597724	0.00047808	0.669204	0.0530407	0.000471071	368.227	3.68467	374.241	2.90743	330.539	20.0204	337
plesovice_14	0.441636	0.00532611	0.0597174	0.000478182	0.663968	0.0536367	0.000483694	371.405	3.74441	373.906	2.90819	355.829	20.2359	337
plesovice_15	0.434157	0.00508298	0.0595634	0.000468375	0.671648	0.0528647	0.000458543	366.124	3.59239	372.97	2.84898	322.992	19.5819	337
plesovice_16	0.444364	0.00578328	0.0601409	0.000508765	0.649998	0.053588	0.000530005	373.325	4.05751	376.482	3.09291	353.776	22.1882	337
plesovice_17	0.438186	0.00559431	0.0594267	0.000529616	0.698058	0.0534781	0.000488879	368.973	3.94201	372.138	3.22181	349.136	20.536	337
plesovice_18	0.441216	0.0049366	0.0603045	0.000479054	0.709999	0.053064	0.000418094	371.11	3.47205	377.477	2.91188	331.535	17.7704	337
plesovice_19	0.45236	0.0051257	0.0600986	0.000448344	0.658382	0.0545907	0.000465586	378.93	3.5772	376.225	2.72578	395.497	19.0117	337
plesovice_20	0.43709	0.00573702	0.0600311	0.000511412	0.649052	0.0528073	0.000527287	368.199	4.04545	375.815	3.10932	320.525	22.5314	337
plesovice_21	0.435598	0.00601122	0.0601514	0.000567724	0.683934	0.0525217	0.00052877	367.143	4.2428	376.546	3.45121	308.19	22.7661	337
plesovice_22	0.431114	0.00512897	0.0581774	0.000442752	0.639688	0.0537448	0.000491467	363.967	3.63253	364.532	2.69668	360.371	20.5016	337
plesovice_23	0.427685	0.00453285	0.0588514	0.000438986	0.703796	0.0527067	0.000396842	361.531	3.2187	368.636	2.67204	316.193	17.0319	337
plesovice_24	0.428827	0.00416203	0.0582711	0.000383312	0.677761	0.0533737	0.000380894	362.343	2.95341	365.103	2.33451	344.717	16.0661	337
plesovice_25	0.430499	0.00447542	0.058297	0.000395768	0.653029	0.053558	0.00042167	363.53	3.17174	365.261	2.4103	352.508	17.6914	337
plesovice_26	0.428823	0.00469131	0.0585247	0.000431019	0.673196	0.053142	0.000429904	362.34	3.32839	366.647	2.62437	334.864	18.2321	337
fc1_1	2.09727	0.0222324	0.200869	0.00154707	0.726551	0.0757254	0.000551571	1147.91	7.26245	1179.98	8.29953	1087.82	14.5291	1099
fc1_2	2.09273	0.0256934	0.200223	0.00170655	0.694218	0.0758047	0.000669877	1146.42	8.40063	1176.52	9.1594	1089.92	17.6039	1099
fc1_3	2.14034	0.0208446	0.205298	0.00151548	0.757976	0.0756131	0.000480335	1161.93	6.71754	1203.72	8.10033	1084.85	12.6847	1099
fc1_4	2.09527	0.0199706	0.201461	0.001436	0.747851	0.0754307	0.000477287	1147.26	6.53016	1183.16	7.70025	1080	12.6439	1099
fc1_6	2.13436	0.0166966	0.204454	0.00136107	0.850994	0.0757132	0.000311054	1160	5.39453	1199.2	7.28054	1087.5	8.21209	1099
fc1_7	2.12219	0.0138106	0.203075	0.00103422	0.782581	0.0757927	0.000307063	1156.05	4.4815	1191.82	5.53925	1089.6	8.096	1099
fc1_8	2.01832	0.0116873	0.193448	0.000940657	0.839732	0.07567	0.000237931	1121.69	3.92411	1140.03	5.07896	1086.35	6.29017	1099
fc1_9	2.02966	0.0196865	0.195638	0.00144279	0.760334	0.0752434	0.000474038	1125.5	6.57653	1151.85	7.77426	1075.01	12.5988	1099
fc1_10	2.05919	0.0184999	0.197277	0.00129592	0.731184	0.0757038	0.000463971	1135.35	6.12186	1160.68	6.97375	1087.25	12.2352	1099
fc1_11	2.04754	0.0157446	0.19752	0.00116114	0.764493	0.0751829	0.000372677	1131.48	5.23232	1161.98	6.24757	1073.4	9.92378	1099
fc1_12	2.02018	0.020072	0.194513	0.00141484	0.732078	0.0753252	0.000509833	1122.32	6.72586	1145.78	7.63092	1077.19	13.5269	1099
fc1_13	2.04071	0.0186895	0.195681	0.00129898	0.724831	0.0756365	0.000477222	1129.2	6.22188	1152.08	6.99954	1085.47	12.5977	1099
fc1_14	2.0293	0.0197983	0.194964	0.00141137	0.742	0.0754902	0.000493751	1125.38	6.61457	1148.21	7.60935	1081.58	13.0649	1099

## Sheet: Info
This Supplemental Material accompanies Gottlieb, E.S., Miller, E.L., Valley, J.W.,
Fisher, C.M., Vervoort, J.D., and Kitajima, K., 2022, Zircon petrochronology of Cretaceous
Cordilleran interior granites of the Snake Range and Kern Mountains, Nevada, USA,
in Craddock, J.P., Malone, D.H., Foreman, B.Z., and Konstantinou, A., eds., Tectonic Evolution
of the Sevier-Laramide Hinterland, Thrust Belt, and Foreland, and Postorogenic Slab Rollback
(180–20 Ma): GSA Special Paper 555, https://doi.org/10.1130/2022.2555(02).
